# Supplementary material for: HS6ST1 Insufficiency Causes Self-Limited Delayed Puberty in Contrast With Other GnRH Deficiency Genes
Source: PubMed Central journal article supplement (PMC6126894; doi:10.1210/jc.2018-00646), 2018-06-20
Supplement: jc.2018-00646.sd1.pdf [file jc.2018-00646.sd1.pdf]

## **Supplementary Appendix**

*HS6ST1* insufficiency causes self-limited delayed puberty in contrast with other GnRH deficiency genes

Authors - Howard SR, Oleari R, Poliandri A, Chantzara V, Fantin A, Ruiz-Babot G, Metherell LA, Cabrera CP, Barnes MR, Wehkalampi K,

Guasti L, Ruhrberg C, Cariboni A, Dunkel L

| AA Change   | dbSNP137    | PhyloP <sup>1</sup><br>Pred | SIFT <sup>2</sup><br>Pred | Polyphen2 <sup>3</sup><br>Pred | LRT <sup>4</sup> Pred | MutationTaster <sup>5</sup><br>Pred | FATHMM <sup>6</sup><br>Pred | CADD <sup>7</sup> Pred | GERP <sup>8++</sup> |
|-------------|-------------|-----------------------------|---------------------------|--------------------------------|-----------------------|-------------------------------------|-----------------------------|------------------------|---------------------|
| p.Arg375His | rs182882999 | C                           | T                         | B                              | D                     | D                                   | D                           | D                      | 4.3                 |

**Supplementary Table 1 – Prediction of variants according to web-based prediction software programs and conservation across species.** C – conserved, D – deleterious, disease causing or damaging, B – benign, T - tolerated

| Nucleotide<br>change | Amino acid<br>change | Exon | MAF from DP<br>probands (%)<br>(n=109) | MAF from cohort controls (%)<br>(n=145) | MAF from Exac database (%)<br>Finnish/European/All |
|----------------------|----------------------|------|----------------------------------------|-----------------------------------------|----------------------------------------------------|
| c.1124G>A            | p.Arg375His          | 2    | 0.92                                   | 0                                       | 0.03/0.003/0.03                                    |

**Supplementary Table 2 – Minor allele frequency in study population and control cohorts.** Minor allele frequency data for the control population was retrieved from the ExAC Browser (Exome Aggregation Consortium (ExAC), Cambridge, MA: <http://exac.broadinstitute.org>, accessed May 2017).

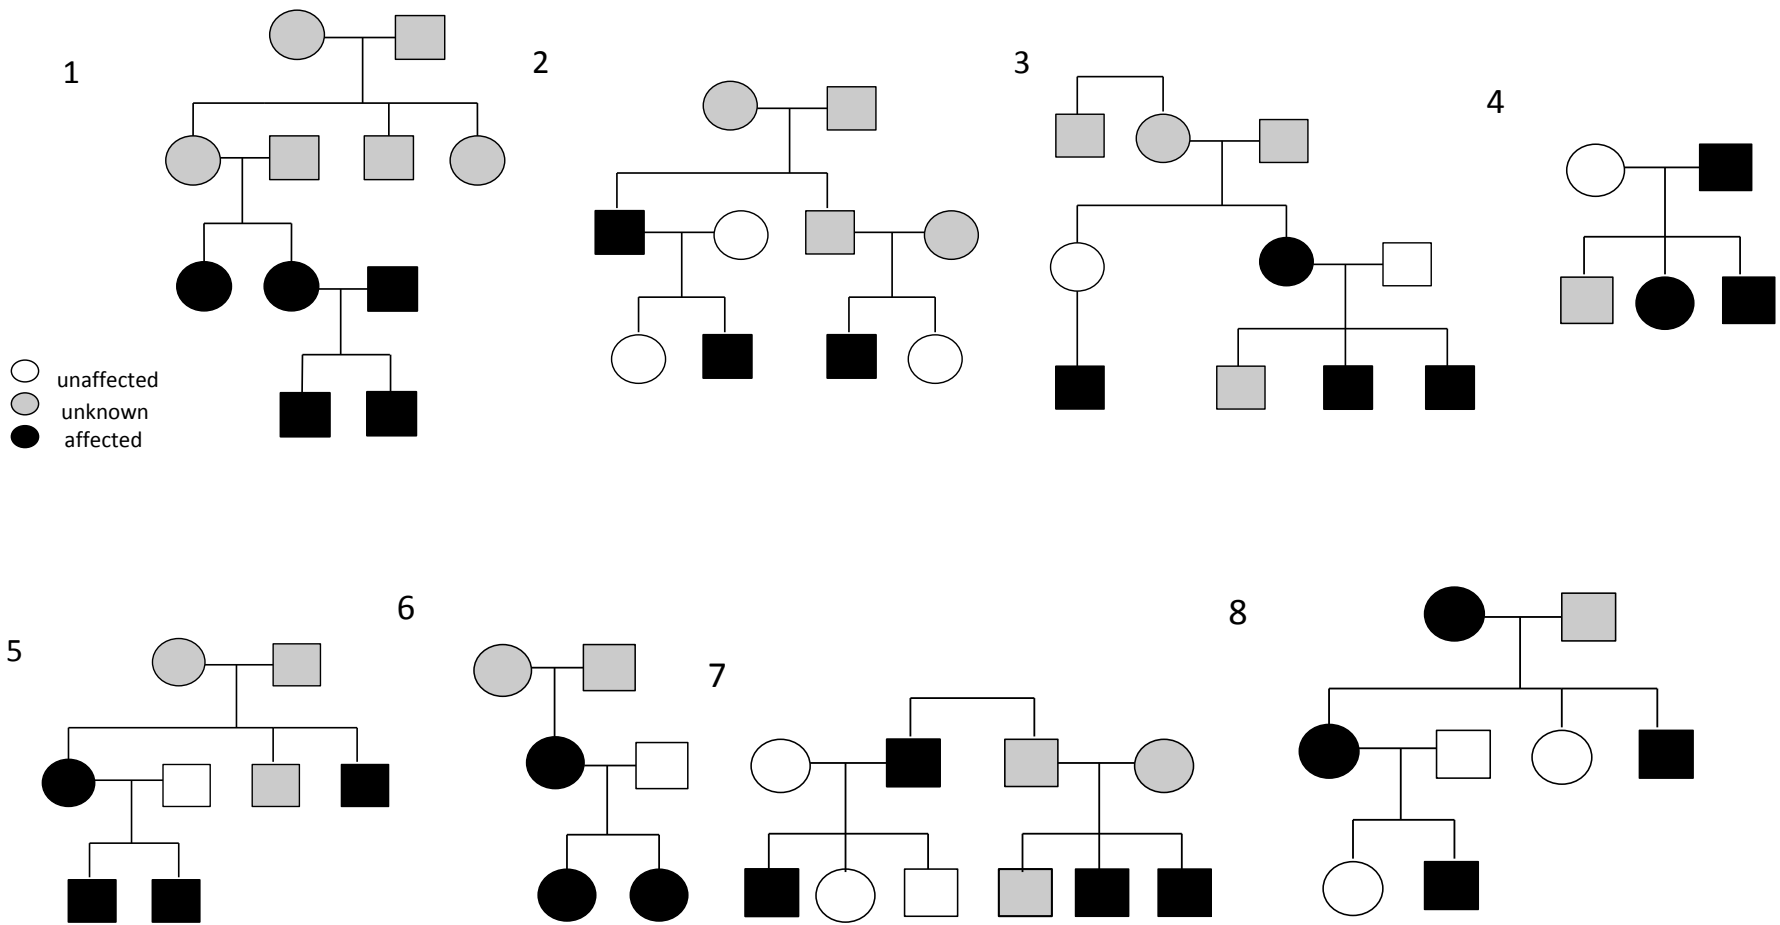

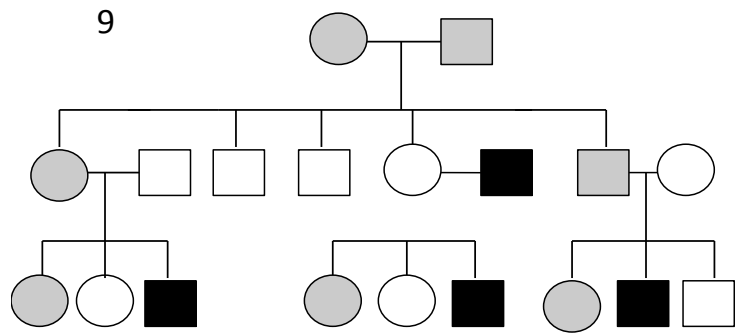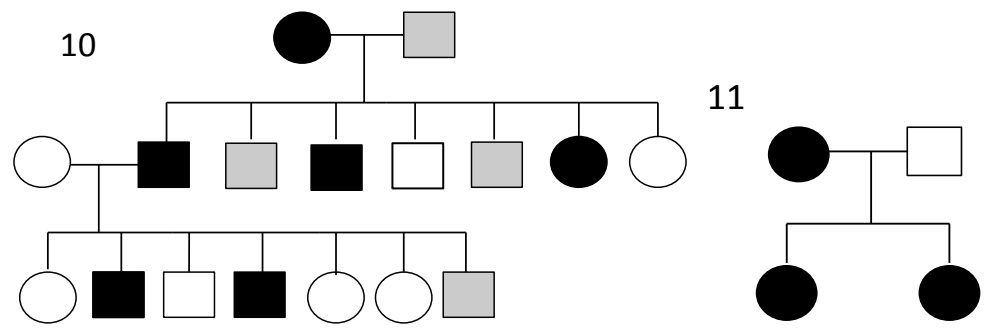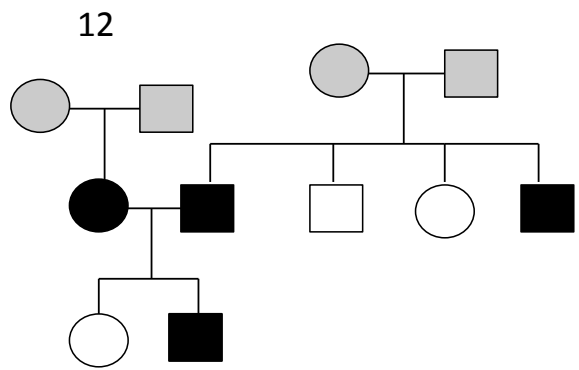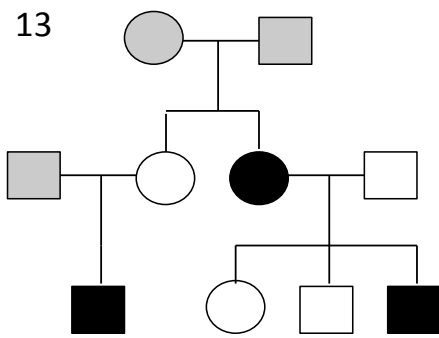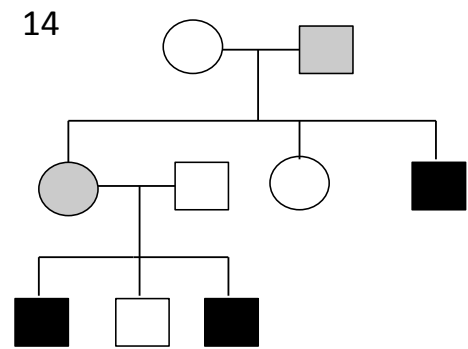

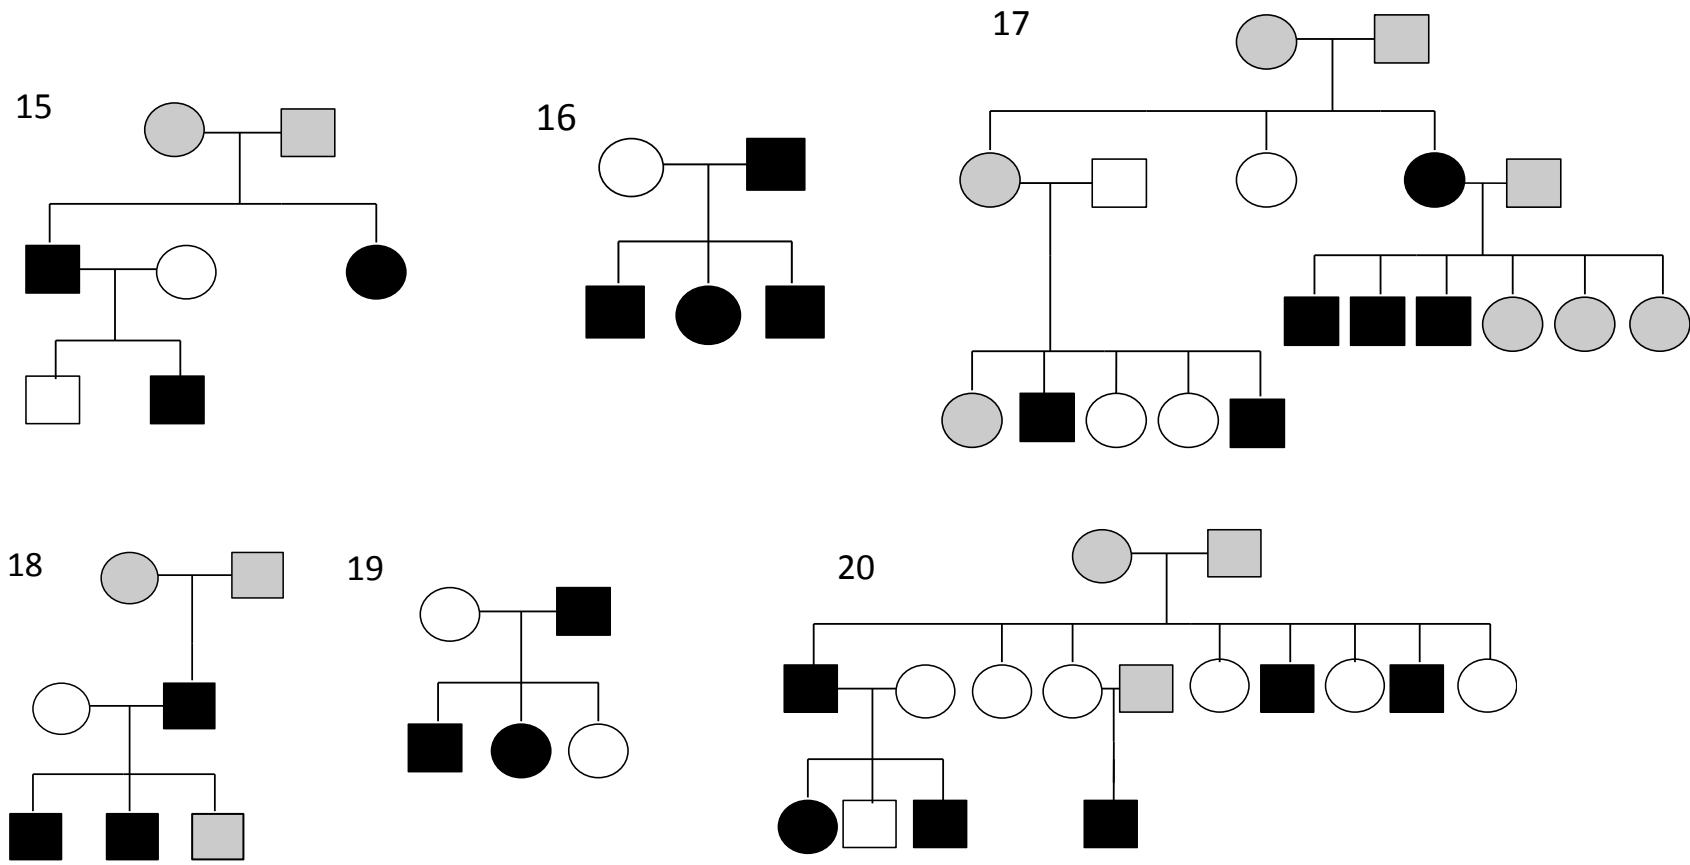

Supplementary Figure 1 – 20 example cohort pedigrees from which probands were sent for initial whole exome sequencing

| species       | match         | gene                               | aa alignment                                        |
|---------------|---------------|------------------------------------|-----------------------------------------------------|
| Human         |               |                                    | 375 Q L E R R E Q R L R S R E E R L L H R A K E A L |
| mutated       | not conserved |                                    | 375 Q L E R R E Q R L R S H E E R L L H R A K E A   |
| Ptroglydytes  | all identical | <a href="#">ENSPTRG00000012440</a> | 375 Q L E R R E Q R L R S R E E R L L H R A K E A   |
| Mmulatta      | all identical | <a href="#">ENSMUG00000030614</a>  | 359 Q L E R R E Q R L R S R E E                     |
| Fcatus        | all identical | <a href="#">ENSFCAG00000012548</a> | 375 Q L E R R E Q R L K S R E E R L L H R A K E A   |
| Mmusculus     | all identical | <a href="#">ENSMUSG00000045216</a> | 375 Q L E R R E Q R L R N R E E R L L H R S K E A   |
| Ggallus       | all identical | <a href="#">ENSGALG00000002155</a> | 346 Q L E R M E Q R I K N R E E R L L H R S N E A   |
| Trubripes     | not conserved | <a href="#">ENSTRUG00000015423</a> | 383 Q Q E R R Q R I K N H I R Q S L T S K L E D     |
| Drerio        | no alignment  | <a href="#">ENSDARG00000054754</a> | n/a                                                 |
| Dmelanogaster | no alignment  | <a href="#">FBgn0038755</a>        | n/a                                                 |
| Celegans      | no alignment  | <a href="#">Y34B4A.3</a>           | n/a                                                 |
| Xtropicalis   | all identical | <a href="#">ENSXETG00000016769</a> | 370 M E Q R K K N R E E R L L H R S N E A           |

**Supplementary Figure 2 Multiple sequence alignment (m.s.a.) for the p.Arg375 (R375) residue.**

M.s.a. was generated using MutationTaster<sup>5</sup>. The p.Arg375 residue is highly conserved amongst different species, GERP score 4.3.

## References

1. Pollard KS, Hubisz MJ, Rosenbloom KR, Siepel A. Detection of nonneutral substitution rates on mammalian phylogenies. *Genome research* 2010;20:110-21.
2. Kumar P, Henikoff S, Ng PC. Predicting the effects of coding non-synonymous variants on protein function using the SIFT algorithm. *Nature protocols* 2009;4:1073-81.
3. Adzhubei IA, Schmidt S, Peshkin L, et al. A method and server for predicting damaging missense mutations. *Nature methods* 2010;7:248-9.
4. Chun S, Fay JC. Identification of deleterious mutations within three human genomes. *Genome research* 2009;19:1553-61.
5. Schwarz JM, Cooper DN, Schuelke M, Seelow D. MutationTaster2: mutation prediction for the deep-sequencing age. *Nature methods* 2014;11:361-2.
6. Shihab HA, Gough J, Cooper DN, et al. Predicting the functional, molecular, and phenotypic consequences of amino acid substitutions using hidden Markov models. *Human mutation* 2013;34:57-65.
7. Kircher M, Witten DM, Jain P, O'Roak BJ, Cooper GM, Shendure J. A general framework for estimating the relative pathogenicity of human genetic variants. *Nature genetics* 2014;46:310-5.
8. Cooper GM, Stone EA, Asimenos G, et al. Distribution and intensity of constraint in mammalian genomic sequence. *Genome research* 2005;15:901-13.
